# Supplementary material
Source: PubMed Central journal article supplement (PMC2857089)
Supplement: supp_M109.082388_jbc.M109.082388-1.pdf [file supp_M109.082388_jbc.M109.082388-1.pdf]

Figure legends (Supplementary figures).

**Fig.S1.** Silencing assays showing that non-fused, native ScFob1 caused rDNA silencing but not the native full length SbFob1 that was expressed from a single copy vector (pRS415) under the transcriptional control of ScFob1 promoter; **B**, 2D gel analysis showed that the plasmid based SbFob1 was biologically active because it caused normal fork arrest at Ter.

**Fig.S2.** 2D gel analysis of the replication intermediates of rDNA from the **A**, silencing strain with WT Fob1, **B**, *tof1* $\Delta$  derivative of the same strain and **C**, the *tof1* $\Delta$ *rrm3* $\Delta$  double deletion of the same showing that fork arrest in the WT site was normal, in *tof1* $\Delta$  cells it was reduced by >90% and was partially restored in the *tof1* $\Delta$ *rrm3* $\Delta$  cells (solid arrows). The open arrows show fork stalling at different regions of rDNA that is a characteristic of *rrm3* $\Delta$ . The data support the interpretation that the sweepase activity of Rrm3 was conserved in the silencing indicator strain.

**A**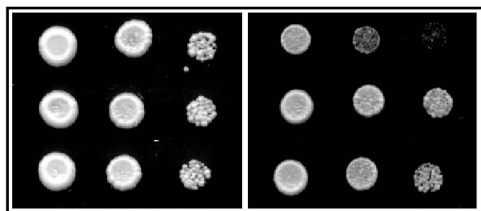**WT/vector****fob1 $\Delta$ /vector****fob1 $\Delta$ /Sb FOB1****B**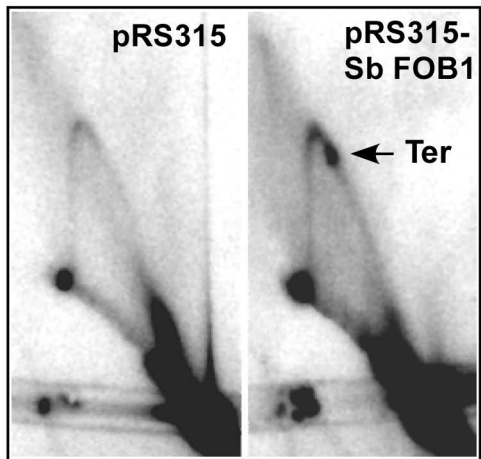**pRS315****pRS315-  
Sb FOB1****← Ter****Fig. S1**

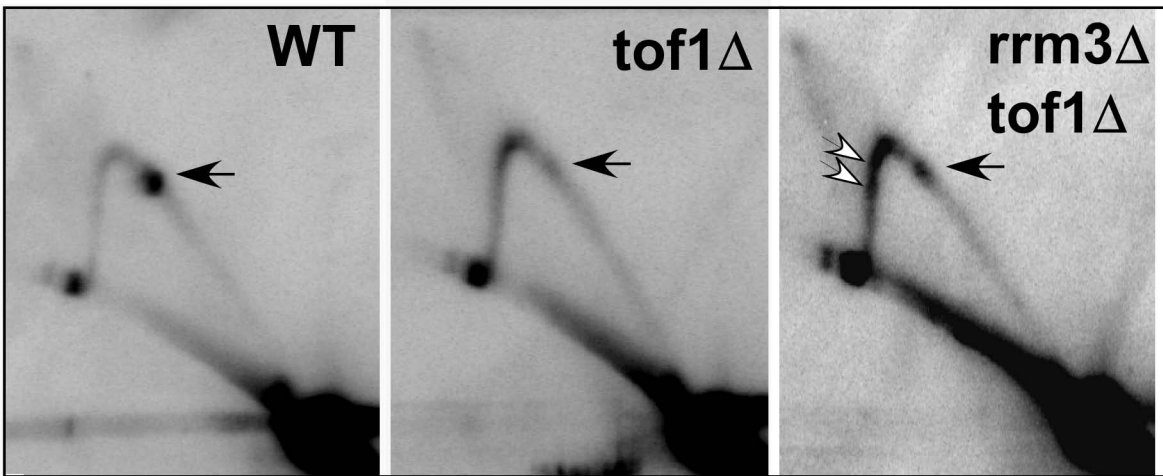

**Fig.S2**
